# Supplementary material for: A better representation of VOC chemistry in WRF-Chem and its impact on ozone over Los Angeles
Source: Copernicus journal article supplement (doi:10.5194/egusphere-2023-2742), 2023-11-27
Supplement: Supplementary file 1 [file egusphere-2023-2742-supplement.pdf]

# Supplement to “A better representation of VOC chemistry in WRF-Chem and its impact on ozone over Los Angeles”

Qindan Zhu, Rebecca H. Schwantes, Matthew Coggon, Colin Harkins, Jordan Schnell, Jian He, Havalala O. T. Pye, Meng Li, Barry Baker, Zachary Moon, Ravan Ahmadov, Eva Y. Pfannerstill, Bryan Place, Paul Wooldridge, Benjamin C. Schulze, Caleb Arata, Anthony Bucholtz, John H. Seinfeld, Carsten Warneke, Chelsea E. Stockwell, Lu Xu, Kristen Zuraski, Michael A. Robinson, Andy Neuman, Patrick R. Veres, Jeff Peischl, Steven S. Brown, Allen H. Goldstein, Ronald C. Cohen, Brian C. McDonald

| Species in RACM2B-VCP | Name                             |
|-----------------------|----------------------------------|
| PROG                  | Propylene glycol                 |
| GLYCR                 | Glycerol                         |
| IPOH                  | Isopropanol                      |
| D4SILX                | D4-Siloxane                      |
| D5SILX                | D5-Siloxane                      |
| PCBTF                 | <i>p</i> -chlorobenzotrifluoride |
| PDCBZ                 | <i>p</i> -dichlorobenzene        |
| ECLP                  | Eucalyptol                       |

Table S1: The addition of new species in RACM2B-VCP mechanism

| Reaction                                                     | Reaction coefficient            | Reference               |
|--------------------------------------------------------------|---------------------------------|-------------------------|
| PROG+HO=0.387 ALD+0.613 HAC+HO2                              | 2.15D-11                        | Coggon et al., 2021     |
| GLYCR+HO=0.45 ALD+0.55 HKET+HO2                              | 5.45D-11                        |                         |
| IPOH+HO=0.861 ACT+0.139 ACTP+0.861 HO2                       | ARR2( 2.1D-12, -270.0.dp, TEMP) |                         |
| D4SILX+HO=ROH+OHR+OHVOC                                      | 1.3D-12                         | Alton and Browne, 2020  |
| D5SILX+HO=ROH+OHR+OHVOC                                      | 2.1D-12                         |                         |
| PCBTF+HO=0.060 TLP1+0.763 TR2+0.177 CSL+0.177 HO2+OHR+OHVOC  | 2.5D-13                         | Atkinson and Arey, 2003 |
| PDCBZ+HO=0.352 BENP+0.118 EPX+0.530 PHEN+0.648 HO2+OHR+OHVOC | 3.2D-13                         |                         |

Table S2: The newly added reactions addressing the VOCs from VCP sources to RACM2B-VCP chemical mechanism as well as their reaction coefficients.

| Photolysis species in RACM-ESRL-VCP | Mapped photolysis species in TUV     |
|-------------------------------------|--------------------------------------|
| pj_o31d                             | j_o1d                                |
| pj_o33p                             | j_o3p                                |
| pj_no2                              | j_no2                                |
| pj_hno3                             | j_hno3                               |
| pj_no3o2                            | j_no3_a                              |
| pj_no3o                             | j_no3_b                              |
| pj_hno4                             | j_hno4                               |
| pj_h2o2                             | j_h2o2                               |
| pj_ch3o2h                           | j_ch3ooh                             |
| pj_ch2or                            | j_ch2o_r                             |
| pj_ch2om                            | j_ch2o_m                             |
| pj_ch3cho                           | j_ch3cho_a + j_ch3cho_b + j_ch3cho_c |
| pj_macr                             | j_macr                               |
| pj_ch3coch3                         | j_ch3coch3                           |
| pj_ch3cocho                         | j_mgly                               |
| pj_ch3coc2h5                        | j_mek                                |
| pj_hcocho                           | j_gly_b                              |
| pj_hcochob                          | j_gly_c                              |
| pj_hchochoc                         | j_gly_a                              |
| pj_hno2                             | j_hno2                               |
| pj_ch3coo2h                         | j_ch3coooh                           |
| pj_hcochest                         | j_biacetyl                           |
| pj_ch3ono2                          | j_ch3ono2                            |

Table S3: The photolysis species mapping between RACM-ESRL-VCP chemical mechanism and TUV photolysis scheme.

| Photolysis species in RACM2-VCP | Mapped photolysis species in TUV     |
|---------------------------------|--------------------------------------|
| pj_o31d                         | j_o1d                                |
| pj_o33p                         | j_o3p                                |
| pj_no2                          | j_no2                                |
| pj_hno3                         | j_hno3                               |
| pj_no3o2                        | j_no3_a                              |
| pj_no3o                         | j_no3_b                              |
| pj_hno4                         | j_hno4                               |
| pj_h2o2                         | j_h2o2                               |
| pj_ch3o2h                       | j_ch3ooh                             |
| pj_ch2or                        | j_ch2o_r                             |
| pj_ch2om                        | j_ch2o_m                             |
| pj_ch3cho                       | j_ch3cho_a + j_ch3cho_b + j_ch3cho_c |
| pj_macr                         | j_macr                               |
| pj_ch3coch3                     | j_ch3coch3                           |
| pj_ch3cocho                     | j_mgly                               |
| pj_ch3coc2h5                    | j_mek                                |
| pj_hcocho                       | j_gly_b                              |
| pj_hcochob                      | j_gly_c                              |
| pj_hno3                         | j_hno2                               |
| pj_ch3coo2h                     | j_ch3coooh                           |
| pj_hcochest                     | j_biacetyl                           |
| pj_ch3ono2                      | j_ch3ono2                            |
| pj_ald                          | j_c2h5cho                            |
| pj_uald                         | j_acrol                              |
| pj_mvk                          | j_mvk                                |
| pj_hcochoc                      | j_gly_a                              |
| pj_bald                         | j_c2h5cho                            |
| pj_iprno3                       | j_2c4h9ono2                          |
| pj_pana                         | j_pan_a                              |
| pj_panb                         | j_pan_b                              |
| pj_hpald                        | j_macr                               |
| pj_glyc                         | j_glyald_a + j_glyald_b + j_glyald_c |
| pj_noa                          | j_ch3coch2ono2                       |
| pj_ibutald                      | j_ch2o_r                             |
| pj_onitOH3                      | j_ch2ohch2ono2                       |
| pj_onit1                        | j_ch2ohch2ono2                       |
| pj_onitOH1                      | j_ch2ohch2ono2                       |
| pj_mpn                          | j_ch3oono2                           |

Table S4: The photolysis species mapping between RACM2B-VCP chemical mechanism and TUV photolysis scheme.

| Reactants  | Products                                           | Rate           |
|------------|----------------------------------------------------|----------------|
| HPALD + hv | -> HO+HO2+0.5 HAC+0.5 MGLY+0.25 GLYC+0.25 GLY+HCHO | 55*j(Pj_macr)  |
| PROPNN+hv  | -> NO2+ACO3+HCHO                                   | j(Pj_noa)      |
| ETHLN+hv   | -> HO2+CO+HCHO+NO2                                 | 4.3*j(Pj_noa)  |
| MACRN+hv   | -> NO2+CO+HAC+HO2                                  | 5.8*j(Pj_noa)  |
| MVKN+hv    | -> GLYC+NO2+ACO3                                   | 1.26*j(Pj_noa) |
| ISOPNB+hv  | -> ISOP+NO2                                        | j(Pj_onitOH1)  |
| ISOPND+hv  | -> ISOP+NO2                                        | j(Pj_onitOH1)  |
| TONIT+hv   | -> KET+NO2                                         | j(Pj_onitOH1)  |
| AONIT+hv   | -> KET+NO2                                         | j(Pj_onitOH1)  |
| UTONIT+hv  | -> UALD+NO2                                        | j(Pj_onitOH1)  |
| HONIT+hv   | -> HKET+NO2                                        | j(Pj_onitOH1)  |
| TONIN+hv   | -> KET+NO2                                         | j(Pj_onitOH1)  |
| UTONIN+hv  | -> UALD+NO2                                        | j(Pj_onitOH1)  |
| IHND+hv    | -> HO2+NO2+UHC+DIBOO                               | j(Pj_onitOH1)  |
| IHNB+hv    | -> HO2+NO2+UHC+DIBOO                               | j(Pj_onitOH1)  |
| TONIH+hv   | -> KET+NO2                                         | j(Pj_onitOH1)  |

Table S5: The extended mapping of photolysis for species that not included in TableS4 between RACM2B-VCP mechanism to TUV lookup table.

| VOC                 | High NOx Conditions |        |        |        | Low NOx Conditions |        |        |        |
|---------------------|---------------------|--------|--------|--------|--------------------|--------|--------|--------|
|                     | 1                   | 10     | 100    | 1000   | 1                  | 10     | 100    | 1000   |
| HC5                 | 0.0000              | 0.0375 | 0.0000 | 0.0000 | 0.0000             | 0.0750 | 0.0000 | 0.0000 |
| HC8                 | 0.0000              | 0.1500 | 0.0000 | 0.0000 | 0.0000             | 0.3000 | 0.0000 | 0.0000 |
| OLT                 | 0.0008              | 0.0450 | 0.0375 | 0.1500 | 0.0045             | 0.0090 | 0.0600 | 0.2250 |
| OLI                 | 0.0030              | 0.0255 | 0.0825 | 0.2700 | 0.0225             | 0.0435 | 0.1290 | 0.3750 |
| TOL, BEN            | 0.0030              | 0.1650 | 0.3000 | 0.4350 | 0.0750             | 0.2250 | 0.3750 | 0.5250 |
| XYL, CSL, XYO, PHEN | 0.0015              | 0.1950 | 0.3000 | 0.4350 | 0.0750             | 0.3000 | 0.3750 | 0.5250 |
| ISO                 | 0.0003              | 0.0225 | 0.0150 | 0.0000 | 0.0090             | 0.0300 | 0.0150 | 0.0000 |
| SESQ                | 0.0750              | 0.1500 | 0.7500 | 0.9000 | 0.0750             | 0.1500 | 0.7500 | 0.0900 |
| API, LIM            | 0.0120              | 0.1215 | 0.2010 | 0.5070 | 0.1073             | 0.0918 | 0.3587 | 0.6075 |

Table S6: SOA Mass Yields for the VOC Precursors and Volatility Bins Used in WRF-CHEM for RACM2B-VCP mechanism.

| Species | Gamma  | Reference                                       |
|---------|--------|-------------------------------------------------|
| ISOPNB  | 0.005  |                                                 |
| TONIT   | 0.01   |                                                 |
| UTONIT  | 0.01   | Fisher et al., 2016                             |
| TONIH   | 0.01   |                                                 |
| HONIT   | 0.01   |                                                 |
| NO2     | 0.0001 |                                                 |
| NO3     | 0.001  | Jacob, 2000                                     |
| N2O5    | 0.1    |                                                 |
| HO2     | 0.1    | Gaubert et al., 2020;<br>Christian et al., 2017 |

Table S7: The summary of uptake coefficients used in RACM2B-VCP mechanisms for both inorganic nitrates and organic nitrates.



| Reactions                             | Rates in RACM2_Berkeley 2.0                                                    | Rates in RACM2B-VCP                                                                   |
|---------------------------------------|--------------------------------------------------------------------------------|---------------------------------------------------------------------------------------|
| O3+NO=NO2(+O2)                        | ARR2( 1.40D-12 , 1310.0.dp, TEMP )                                             | ARR2( 3.0D-12 , 1500.0.dp, TEMP )                                                     |
| O3+NO2=NO3(+O2)                       | ARR2( 1.40D-13 , 2470.0.dp, TEMP )                                             | ARR2( 1.20D-13 , 2430.0.dp, TEMP )                                                    |
| O1D+H2O=HO+HO                         | 2.20D-10                                                                       | ARR2(1.63D-10, -60.0.dp, TEMP)                                                        |
| HO+M(=H2)=H2O+HO2                     | (5.31D-7*ARR2( 7.70D-12 , 2100.0.dp, TEMP ) )                                  | (5.31D-7*ARR2( 2.80D-12 , 1800.0.dp, TEMP ) )                                         |
| H02+H02=H2O2(+O2)                     | (2.2D-13*EXP(600./TEMP) + 1.90D-33* C.M *EXP(980./TEMP))                       | (3.0D-13*EXP(460./TEMP) + 2.10D-33* C.M *EXP(920./TEMP))                              |
| H02+H02+H2O=H2O2+H2O(+O2)             | (3.08D-34* EXP(2800./TEMP)+ 2.59D-54* C.M *EXP(3180./TEMP))                    | (4.20D-34* EXP(2660./TEMP)+ 2.9D-54* C.M *EXP(3120./TEMP))                            |
| H2O2+HO=HO2+H2O                       | ARR2( 2.90D-12 , 160.0.dp, TEMP )                                              | 1.8D-12                                                                               |
| HO2+NO=NO2+HO                         | ARR2( 3.60D-12 , -270.0.dp, TEMP )                                             | ARR2( 3.44D-12 , -260.0.dp, TEMP )                                                    |
| HO+HONO=NO2+H2O                       | ARR2( 2.50D-12 , -260.0.dp, TEMP )                                             | ARR2( 3.0D-12 , -250.0.dp, TEMP )                                                     |
| O3P+NO2=NO(+O2)                       | ARR2( 5.50D-12 , -188.0.dp, TEMP )                                             | *ARR2( 5.10D-12 , -210.0.dp, TEMP )                                                   |
| HO+NO2=HNO3                           | TROE(1.49D-30 , 1.8.dp , 2.58D-11 , 0.0.dp , TEMP, C.M)                        | TROE..JPL19( 1.80D-30 , 3.0.dp , 2.8D-11 , 0.0.dp , TEMP, C.M)                        |
| H02+N03=0.3 HNO3+0.7 NO2+0.7 HO (+O2) | 4.00D-12                                                                       | 3.50D-12                                                                              |
| NO3+NO=NO2+NO2                        | ARR2( 1.80D-11 , -110.0.dp , TEMP )                                            | ARR2( 1.70D-11 , -125.0.dp , TEMP )                                                   |
| NO3+NO2=NO+NO2(+O2)                   | ARR2( 4.50D-14 , 1260.0.dp, TEMP )                                             | ARR2( 4.35D-14 , 1335.0.dp, TEMP )                                                    |
| NO3+NO2=N2O5                          | TROE(2.00D-30 , 4.4.dp , 1.40D-12 , 0.7.dp , TEMP, C.M)                        | TROE..JPL19( 2.40D-30 , 3.0.dp , 1.60D-12 , -0.1.dp , TEMP, C.M)                      |
| N2O5=NO2+NO3                          | TROEE(3.70D26,11000.0.dp, 2.00D-30 , 4.4.dp , 1.40D-12 , 0.7.dp , TEMP, C.M )  | TROEE..JPL19(1.72D26,10840.0.dp, 2.40D-30 , 3.0.dp , 1.60D-12 , -0.1.dp , TEMP, C.M ) |
| H02+NO2=HNO4                          | TROE(2.00D-31 , 3.4.dp , 2.90D-12 , 1.1.dp , TEMP, C.M)                        | TROE..JPL19( 1.90D-31 , 3.4.dp , 4.0D-12 , 0.3.dp , TEMP, C.M)                        |
| HNO4=HO4+NO2                          | TROEE( 4.76D26,10900.0.dp, 2.00D-31 , 3.4.dp , 2.90D-12 , 1.1.dp , TEMP, C.M ) | TROEE..JPL19( 4.76D26,10900.0.dp, 1.90D-31 , 3.4.dp , 4.00D-12 , 0.3.dp , TEMP, C.M ) |
| HO+HNO4=NO2+H2O(+O2)                  | ARR2( 1.30D-12 , -380.0.dp, TEMP )                                             | ARR2( 4.50D-13 , -610.0.dp, TEMP )                                                    |
| HO+SO2=SULF+HO2                       | TROE( 3.30D-31 , 4.3.dp , 1.60D-12 , 0.0.dp , TEMP, C.M)                       | TROE..JPL19( 2.90D-31 , 4.1.dp , 1.70D-12 , -0.2.dp , TEMP, C.M)                      |

Table S8: The updates of inorganic reaction rates from RACM2\_Berkeley2.0 mechanism to RACM2B-VCP mechanism.

| Emission Category | Full Name                                                 | RACM_ESRL-VCP |        | RACM2B-VCP |        |
|-------------------|-----------------------------------------------------------|---------------|--------|------------|--------|
|                   |                                                           | Name          | Weight | Name       | Weight |
| CO                | CO                                                        | e_co          | 1.00   | e_co       | 1.00   |
| NOX               | NO                                                        | e_no          | 0.90   | e_no       | 0.90   |
|                   | NO2                                                       | e_no2         | 0.092  | e_no2      | 0.092  |
|                   | HONO                                                      | e_hono        | 0.008  | e_hono     | 0.008  |
| SO2               | SO2                                                       | e_so2         | 1.00   | e_so2      | 1.00   |
| NH3               | NH3                                                       | e_nh3         | 1.00   | e_nh3      | 1.00   |
| HC01              | Methane                                                   | e_ch4         | 1.00   | e_ch4      | 1.00   |
| HC02              | Ethane, kOH<500 /ppm/min                                  | e_eth         | 1.00   | e_eth      | 1.00   |
| HC03              | Alkane 500<kOH<2500 exclude(C3H8,C2H2,ethanol,acids)      | e_hc3         | 1.00   | e_hc3      | 1.00   |
| HC04              | Alkane 2500<kOH<5000 exlude(butanes)                      | e_hc3         | 1.11   | e_hc3      | 1.11   |
| HC05              | Alkane 5000<kOH<10000 exlude(pentanes)                    | e_hc5         | 0.97   | e_hc5      | 0.97   |
| HC06              | Alkane kOH>10000 exclude(ethylene glycol)                 | e_hc8         | 1.00   | e_hc8      | 1.00   |
| HC07              | Ethylene                                                  | e_ol2         | 1.00   | e_ol2      | 1.00   |
| HC08              | Alkene kOH <20000 /ppm/min                                | e_olt         | 1.00   | e_olt      | 1.00   |
| HC09              | Alkene kOH >20000 /ppm/min exclude(dienes,styrenes)       | e_oli         | 1.00   | e_oli      | 1.00   |
| HC10              | Isoprene                                                  | e_iso         | 1.00   | e_iso      | 1.00   |
| HC11              | Anthro terpenes (VCPs 7/3/19)                             | e_terp        | 1.00   | e_terp     | 1.00   |
| HC12              | Aromatic kOH <20000 /ppm/min exclude(benzene and toluene) | e_tol         | 1.00   | e_ben      | 0.50   |
|                   |                                                           |               |        | e_tol      | 0.50   |
| HC13              | Aromatic kOH >20000 /ppm/min exclude(xylenes)             | e_xyl         | 1.00   | e_xyl      | 0.67   |
|                   |                                                           |               |        | e_xyo      | 0.33   |
| HC14              | Formaldehyde                                              | e_hcho        | 1.00   | e_hcho     | 1.00   |
| HC15              | Acetaldehyde                                              | e_ald         | 1.00   | e_acd      | 1.00   |
| HC16              | Higher aldehydes                                          | e_ald         | 1.00   | e_ald      | 1.00   |
| HC17              | Benzaldehyde                                              | e_ald         | 1.00   | e_bald     | 1.00   |
| HC18              | Acetone                                                   | e_act         | 1.00   | e_act      | 1.00   |
| HC19              | Methylethyl ketone                                        | e_ket         | 1.61   | e_mek      | 1.00   |
| HC20              | PRD2 SAPRAC species (aromatic ketones)                    | e_ket         | 1.61   | e_ket      | 1.61   |
| HC21              | Methanol                                                  | e_moh         | 1.00   | e_moh      | 1.00   |
| HC22              | Glyoxal                                                   | e_gly         | 1.00   | e_gly      | 1.00   |
| HC23              | Methylglyoxal                                             | e_mgly        | 1.00   | e_mgly     | 1.00   |
| HC24              | Biacetyl                                                  | e_mgly        | 1.00   | e_mgly     | 1.00   |
| HC25              | Phenols                                                   | e_csl         | 1.00   | e_phen     | 1.00   |
| HC26              | Cresols                                                   | e_csl         | 1.00   | e_csl      | 1.00   |
| HC27              | Methacrolein                                              | e_macr        | 1.00   | e_macr     | 1.00   |
| HC28              | Methylvinyl ketone                                        | e_macr        | 1.00   | e_mvkr     | 1.00   |
| HC29              | IPRD SAPRAC species (>C4 unsaturated aldehydes)           | e_ket         | 1.00   | e_ket      | 1.00   |
| HC30              | Formic Acid add 1/10/2023                                 | e_ora1        | 1.00   | e_ora1     | 1.00   |
| HC31              | Acetic Acid                                               | e_ora2        | 1.00   | e_ora2     | 1.00   |
| HC32              | >C2 Acids (SAPRC PACD species)                            | e_ora2        | 1.00   | e_ora2     | 1.00   |
| HC33              | Xylenols (SAPRC-11 species)                               | e_csl         | 1.00   | e_csl      | 1.00   |
| HC34              | Catechols (SAPRC-11 species)                              | e_csl         | 1.00   | e_mct      | 1.00   |
| HC36              | Propylene                                                 | e_olt         | 1.00   | e_olt      | 1.00   |
| HC37              | Acetylene                                                 | e_hc3         | 0.40   | e_ace      | 1.00   |
| HC38              | Benzene                                                   | e_tol         | 0.29   | e_ben      | 1.00   |
| HC39              | Butanes                                                   | e_hc3         | 1.11   | e_hc3      | 1.11   |
| HC40              | Pentanes                                                  | e_hc5         | 0.97   | e_hc5      | 0.97   |
| HC41              | Toluene                                                   | e_tol         | 1.00   | e_tol      | 1.00   |
| HC42              | m-Xylene                                                  | e_xyl         | 1.00   | e_xyl      | 1.00   |
| HC43              | o-Xylene                                                  | e_xyl         | 1.00   | e_xyo      | 1.00   |
| HC44              | p-Xylene                                                  | e_xyl         | 1.00   | e_xyl      | 1.00   |
| HC45              | Propane                                                   | e_hc3         | 0.57   | e_hc3      | 0.57   |
| HC46              | Dienes                                                    | e_oli         | 1.00   | e_dien     | 1.00   |
| HC47              | Styrenes                                                  | e_olt         | 1.00   | e_olt      | 1.00   |
| HC48              | Ethanol                                                   | e_eoh         | 1.00   | e_eoh      | 1.00   |
| HC49              | Ethylene Glycol                                           | e_eteg        | 1.00   | e_eteg     | 1.00   |
| PM01              | Unspeciated primary PM2.5 - nuclei mode                   | e_pm25i       | 0.20   | e_pm25i    | 0.20   |
|                   | Unspeciated primary PM2.5 - accumulation mode             | e_pm25j       | 0.80   | e_pm25j    | 0.80   |
| PM02              | Sulfate PM2.5 - nuclei mode                               | e_so4i        | 0.20   | e_so4i     | 0.20   |
|                   | Sulfate PM2.5 - accumulation mode                         | e_so4j        | 0.80   | e_so4j     | 0.80   |
| PM03              | Nitrate PM2.5 - nuclei mode                               | e_no3i        | 0.20   | e_no3i     | 0.20   |
|                   | Nitrate PM2.5 - accumulation mode                         | e_no3j        | 0.80   | e_no3j     | 0.80   |
| PM04              | Organic Carbon PM2.5 - nuclei mode                        | e_orgi        | 0.20   | e_orgi     | 0.20   |
|                   | Organic Carbon PM2.5 - accumulation mode                  | e_orgj        | 0.80   | e_orgj     | 0.80   |
| PM05              | Elemental Carbon PM2.5 - nuclei mode                      | e_eci         | 0.20   | e_eci      | 0.20   |
|                   | Elemental Carbon PM2.5 - accumulation mode                | e_ecj         | 0.80   | e_ecj      | 0.80   |
| PM06              | Non-Carbon Organic, PM2.5 - nuclei mode                   | e_orgi        | 0.20   | e_orgi     | 0.20   |
|                   | Non-Carbon Organic, PM2.5 - accumulation mode             | e_orgj        | 0.80   | e_orgj     | 0.80   |
| PM10-PRI          | Unspeciated Primary PM10                                  | e_pm10        | 1.00   | e_pm10     | 1.00   |
| CO2               | CO2                                                       | e_co2         | 1.00   | e_co2      | 1.00   |
| HC51              | Isopropyl Alcohol, Oxygenated VCP add 8/2/20              | e_ipoh        | 1.00   | e_ipoh     | 1.00   |
| HC52              | Propylene Glycol, Oxygenated VCP add 8/2/20               | e_prog        | 1.00   | e_prog     | 1.00   |
| HC53              | Glycerol, Oxygenated VCP add 8/2/20                       | e_glyc        | 1.00   | e_glyc     | 1.00   |
| HC54              | D4-Siloxane add 8/10/22                                   | e_tol         | 0.29   | e_d4silx   | 1.00   |
| HC55              | D5-Siloxane add 8/10/22                                   | e_tol         | 0.29   | e_d5silx   | 1.00   |
| HC56              | Other Siloxane add 8/10/22                                | e_tol         | 0.29   | e_ben      | 1.00   |
| HC58              | pcbtf add 8/10/22                                         |               | 1.00   | e_pcbtf    | 1.00   |
| HC59              | pcbcbz add 8/10/22                                        |               | 1.00   | e_pcbcbz   | 1.00   |

Table S9: The speciation of VOCs for both RACM-ESRL-VCP and RACM2B-VCP mechanism in the FIVE+VCP emission inventory with the addition of cooking emission.

| Observations   | Instrument         | Species                                                                                                                                      | PI                                                                   |
|----------------|--------------------|----------------------------------------------------------------------------------------------------------------------------------------------|----------------------------------------------------------------------|
| RECAP airborne | UCBerkeley PTR-TOF | VOCs: methanol, ethanol, acetaldehyde, acetone, isoprene, macr, mvk, monoterpene, benzene, toluene, benzaldehyde, xylene, d5-siloxane, PCBTF | Allen Goldstein                                                      |
|                | UCBerkeley TD-LIF  | NO, NO2                                                                                                                                      | Ronald C. Cohen                                                      |
|                | Caltch Picarro     | CH4, CO                                                                                                                                      | John H. Seinfeld                                                     |
| SUNVEx mobile  | NOAA PTR-TOF-MS    | VOCs: methanol, ethanol, acetaldehyde, acetone, isoprene, macr, mvk, monoterpene, benzene, toluene, benzaldehyde, xylene, d5-siloxane, PCBTF | Matthew Coggon, Chelsea Stockwell, Lu Xu, Carsten Warneke            |
|                | NOAAPicarro        | CH4                                                                                                                                          | Jeff Peischl                                                         |
|                | NOAAANoxCaRD       | NO, NO2                                                                                                                                      | Kristen Zuraski, Michael A. Robinson, Jeff Peischl, Steven. S. Brown |
| SUNVEx ground  | NOAA CIMS          | PAN                                                                                                                                          | Michael A Robinson, Andy Neuman, Patrick R. Veres                    |
|                | NOAA PTR-TOF-MS    | VOCs: methanol, ethanol, acetaldehyde, acetone, isoprene, macr, mvk, monoterpene, benzene, toluene, benzaldehyde, xylene, d5-siloxane, PCBTF | Matthew Coggon, Chelsea Stockwell, Lu Xu, Carsten Warneke            |
|                | NOAAPicarro        | CH4, CO                                                                                                                                      | Jeff Peischl                                                         |
|                | Caltch AMS         | Aerosol                                                                                                                                      | John H. Seinfeld                                                     |

Table S10: The list of instruments and the corresponding measured species used in our study from RECAP and SUNVEx field campaigns.

| Site name             | Longitude | Latitude | RACM-ESRL-VCP | RACM2B-VCP   |
|-----------------------|-----------|----------|---------------|--------------|
| West Los Angeles      | -118.46   | 34.05    | 0.11 (0.51)   | 0.06 (0.49)  |
| North Main Street     | -118.23   | 34.07    | 0.08 (0.77)   | 0.04 (0.76)  |
| Compton               | -118.2    | 33.90    | -0.02 (0.64)  | -0.06 (0.65) |
| Signal Hill (LBSH)    | -118.17   | 33.79    | -0.08 (0.54)  | -0.12 (0.55) |
| Pasadena              | -118.13   | 34.13    | 0.09 (0.80)   | 0.07 (0.81)  |
| Pico Rivera           | -118.07   | 34.01    | 0.18 (0.78)   | 0.15 (0.79)  |
| La Habra              | -117.95   | 33.92    | 0.24 (0.75)   | 0.21 (0.76)  |
| Anaheim               | -117.94   | 33.83    | 0.21 (0.71)   | 0.16 (0.72)  |
| Upland                | -117.63   | 34.10    | 0.13 (0.87)   | 0.18 (0.88)  |
| Mira Loma (Van Buren) | -117.49   | 34.00    | 0.11 (0.87)   | 0.09 (0.88)  |
| Rubidoux              | -117.42   | 34.00    | 0.11 (0.87)   | 0.09 (0.88)  |
| San Bernardino        | -117.27   | 34.11    | 0.10 (0.85)   | 0.09 (0.86)  |

Table S11: The comparison of hourly  $O_3$  in both WRF-Chem simulations with RACM-ESRL-VCP and RACM2B-VCP mechanism against the AQS site measurements over the study time period, including June and August 2021. For each site, we calculate the normalized mean bias (NMB) and the coefficient of determination ( $R^2$ ). The  $R^2$  is shown in the parenthesis.

| Site name          | Longitude | Latitude | RACM-ESRL-VCP | RACM2B-VCP   |
|--------------------|-----------|----------|---------------|--------------|
| Compton            | -118.2    | 33.90    | -0.06 (0.03)  | -0.07 (0.03) |
| Signal Hill (LBSH) | -118.17   | 33.79    | -0.23 (0.08)  | -0.23 (0.09) |
| Anaheim            | -117.94   | 33.83    | -0.17 (0.13)  | -0.19 (0.15) |
| Ontario            | -117.62   | 34.03    | -0.20 (0.18)  | -0.17 (0.22) |
| Rubidoux           | -117.42   | 34.00    | -0.08 (0.23)  | -0.09 (0.24) |

Table S12: The comparison of hourly  $PM_{2.5}$  in both WRF-Chem simulations with RACM-ESRL-VCP and RACM2B-VCP mechanism against the AQS site measurements over the study time period, including June and August 2021. For each site, we calculate the normalized mean bias (NMB) and the coefficient of determination ( $R^2$ ). The  $R^2$  is shown in the parenthesis.

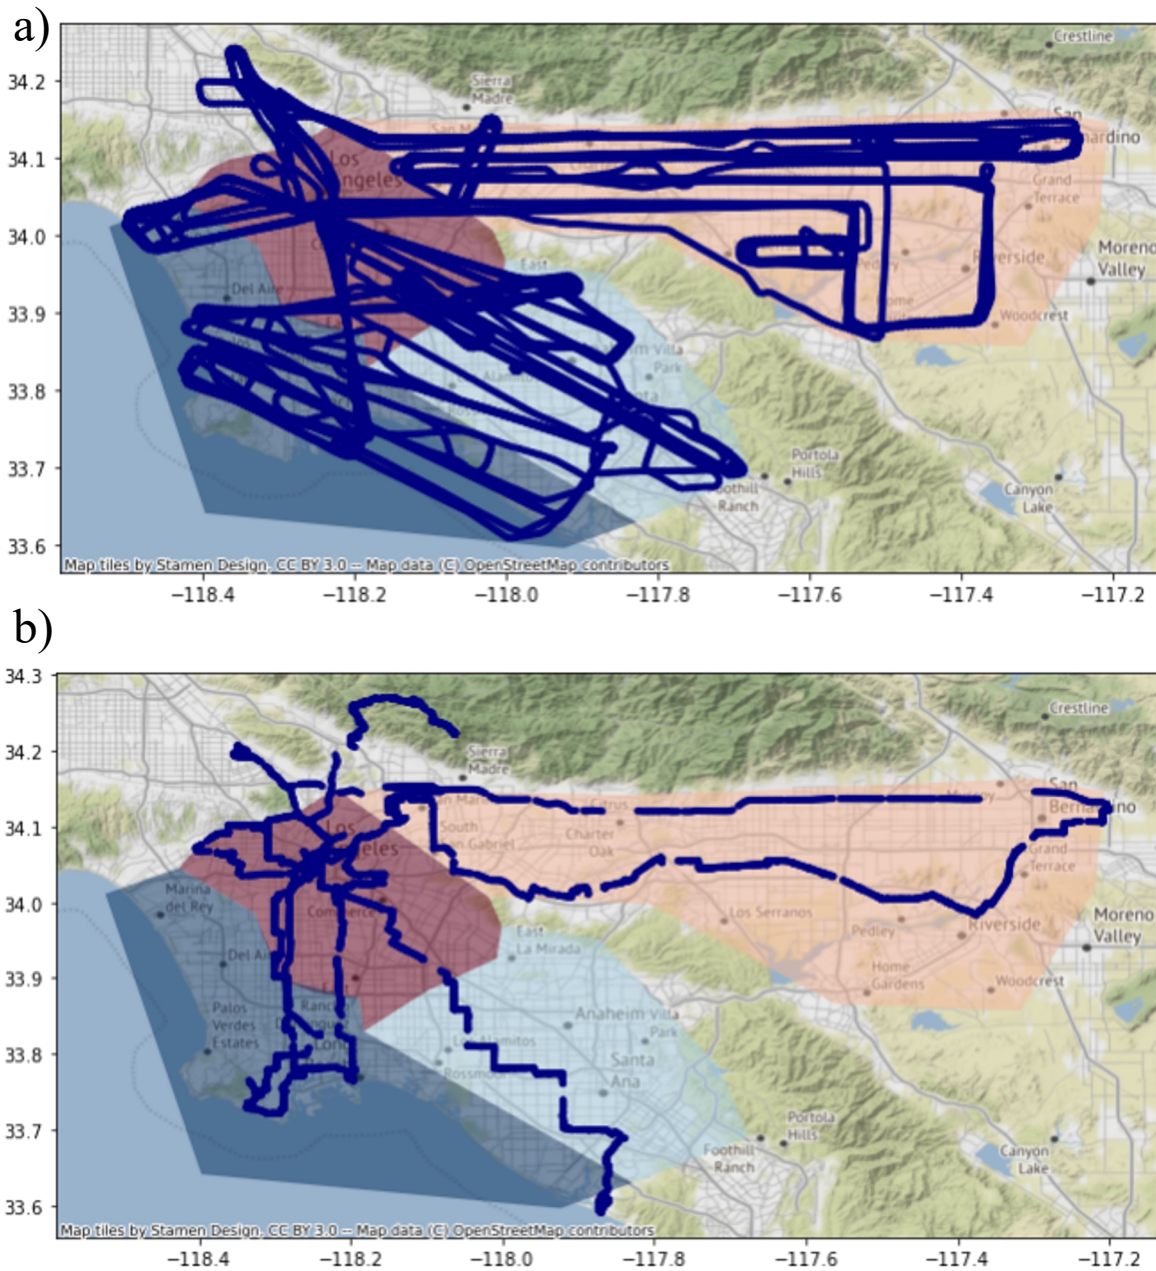

Figure S1: a) the flight track for 9 flights during RECAP-CA field campaign; b) the track of 8 days mobile laboratory by NOAA CSL during SUNVEx field campaign. Both flight and mobile tracks are categorized into four regions in colored shades: Downtown LA (red), San Bernadino Valley (pink), Santa Ana Valley (light blue), and Coastal LA (dark blue).

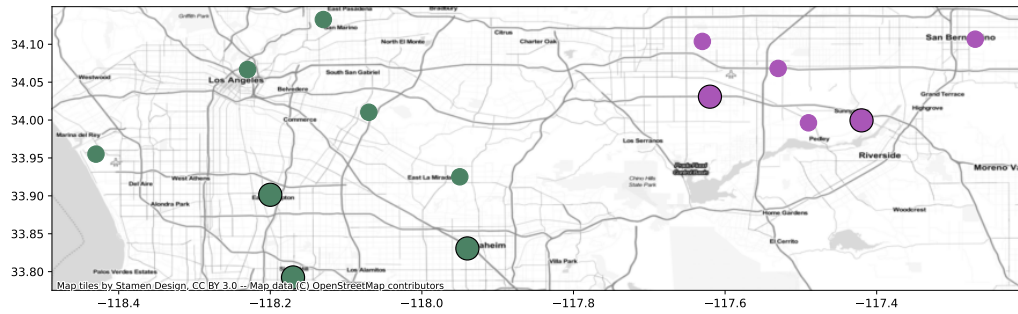

Figure S2: The map of AQS sites with available O<sub>3</sub> and PM<sub>2.5</sub> observations. The sites in green are in the region categorized as West/Central LA, and the sites in purple are in the region categorized as East Basin. Ozone observations are available for all sites, and the PM<sub>2.5</sub> observations are only available in sites marked with larger size and black edge colors.

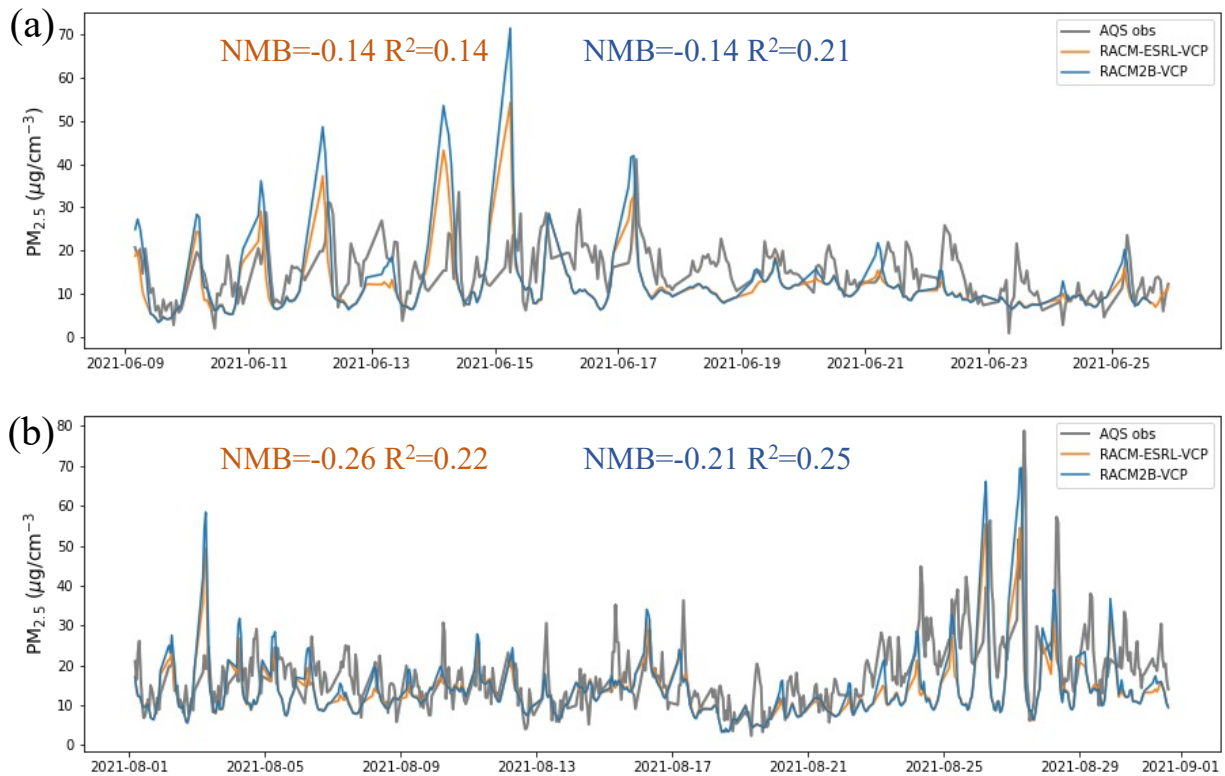

Figure S3: The comparison of time series of hourly  $PM_{2.5}$  between AQS site and two WRF-Chem simulations, one with RACM-ESRL-VCP and another one with RACM2B-VCP chemical mechanism at AQS site at Ontario site ( $-117.62^\circ$  longitude,  $34.03^\circ$  latitude). The corresponding  $R^2$  between model simulations and observations of hourly  $PM_{2.5}$  is shown on each plot.



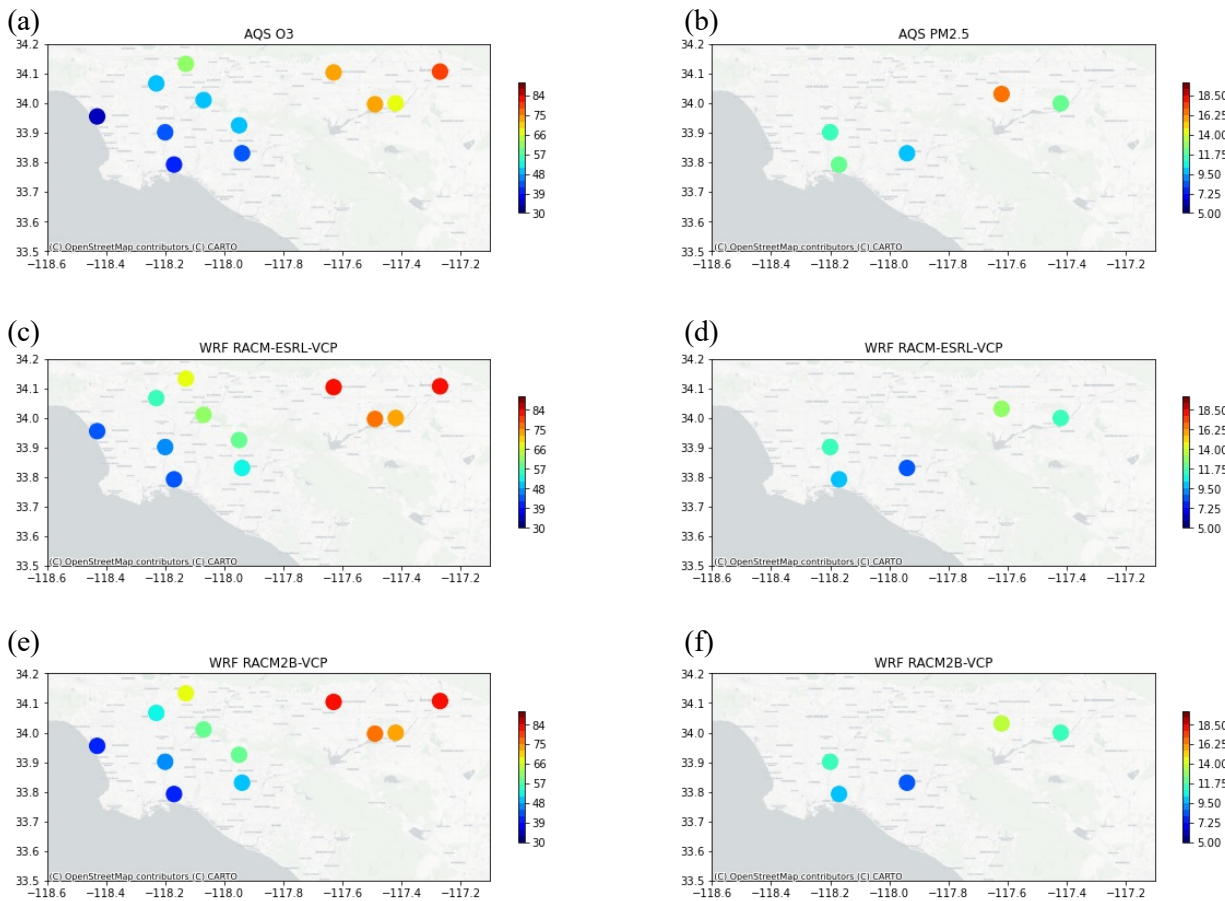

Figure S4: The map of MDA8 O<sub>3</sub> and daily PM<sub>2.5</sub> averaged over the study period from observations (a and b), from WRF-Chem simulation with RACM-ESRL-VCP chemical mechanism (c and d), and from WRF-Chem simulation with RACM2B-VCP chemical mechanism (e and f).

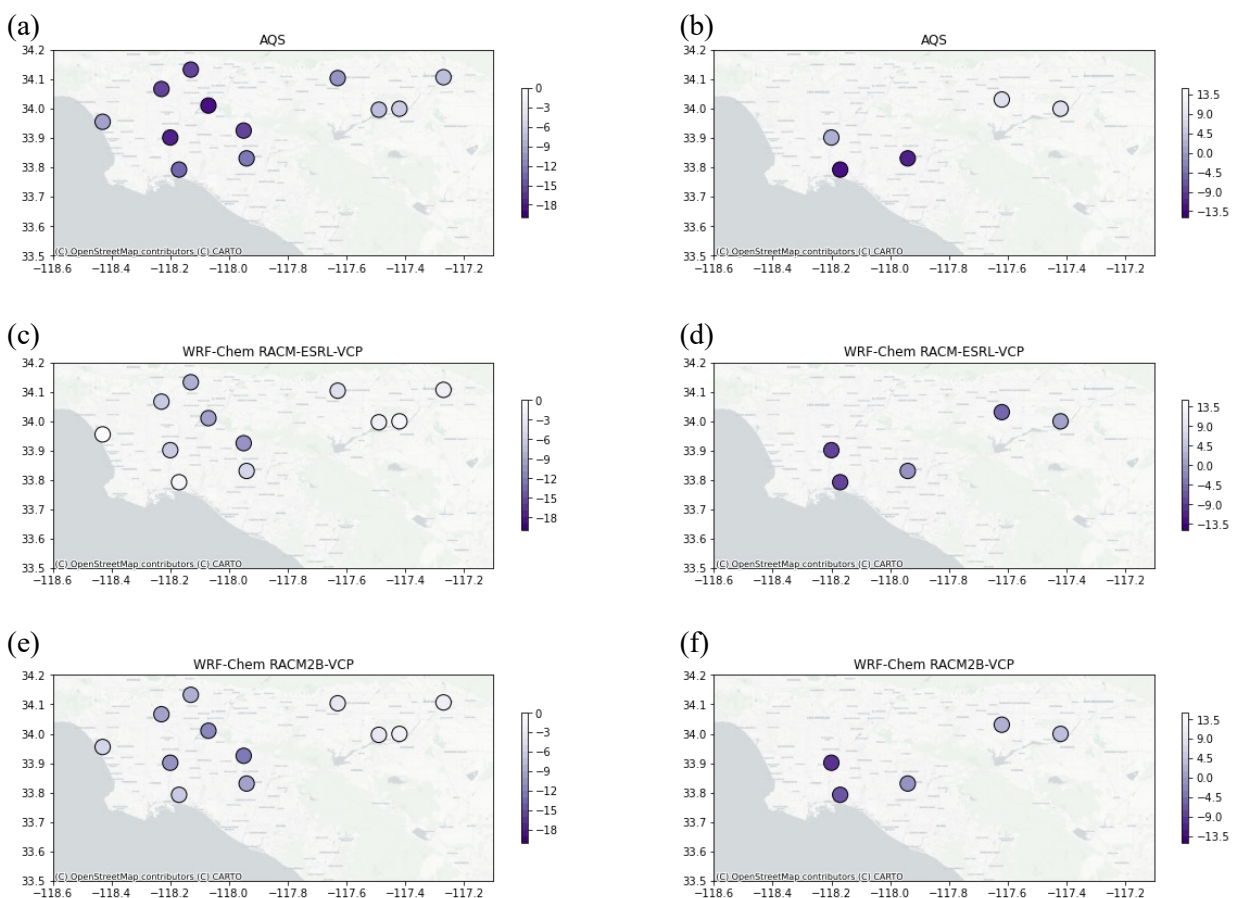

Figure S5: The map of the weekday-weekend difference relative to the average of MDA8 O<sub>3</sub> ( $\Delta$  MDA8 O<sub>3</sub>) and daily PM<sub>2.5</sub> from observations (a and b), from WRF-Chem simulation with RACM-ESRL-VCP chemical mechanism (c and d), and from WRF-Chem simulation with RACM2B-VCP chemical mechanism (e and f).

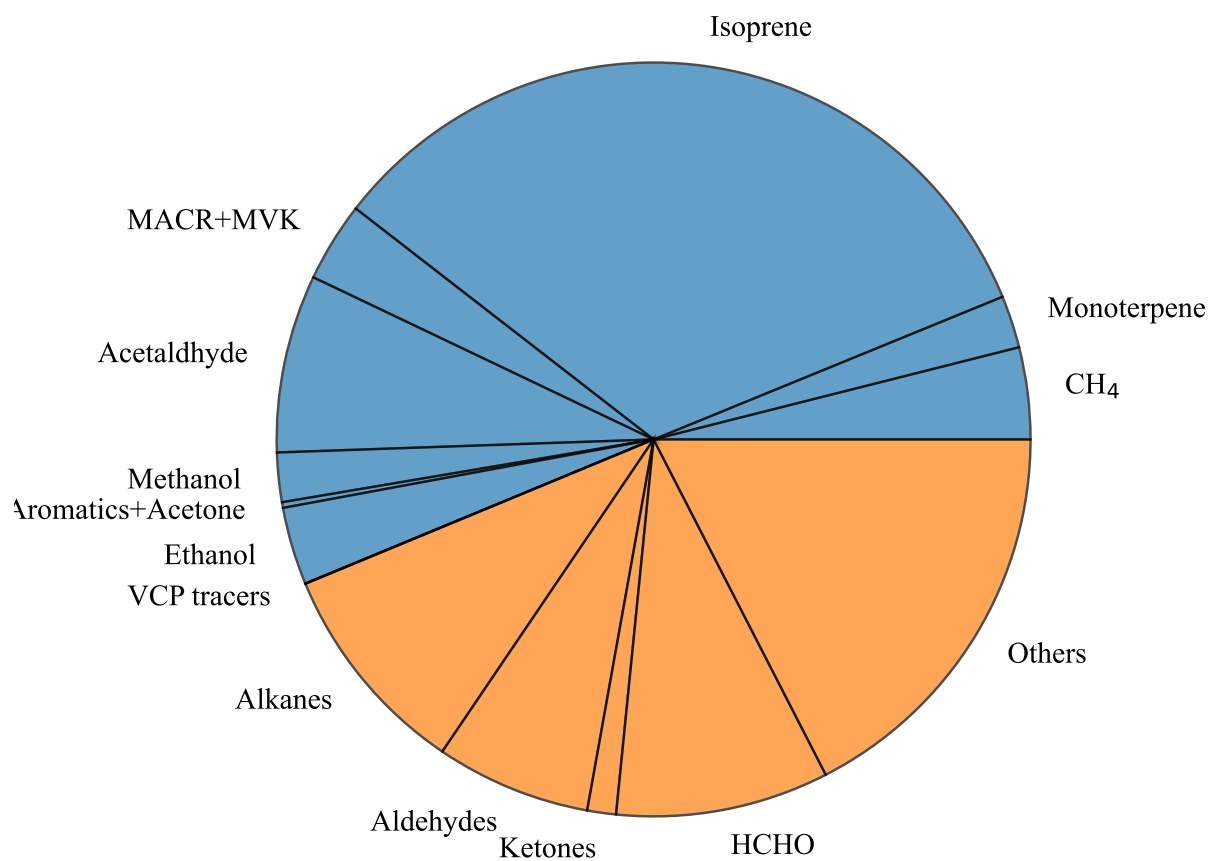

Figure S6: The budget of total surface VOC reactivity averaged over the LA region during the time period. The contributions from VOC species that are measured and calibrated during RECAP and SUNVEx field campaigns are shown in blue, and the contributions from other VOC species are shown in orange.

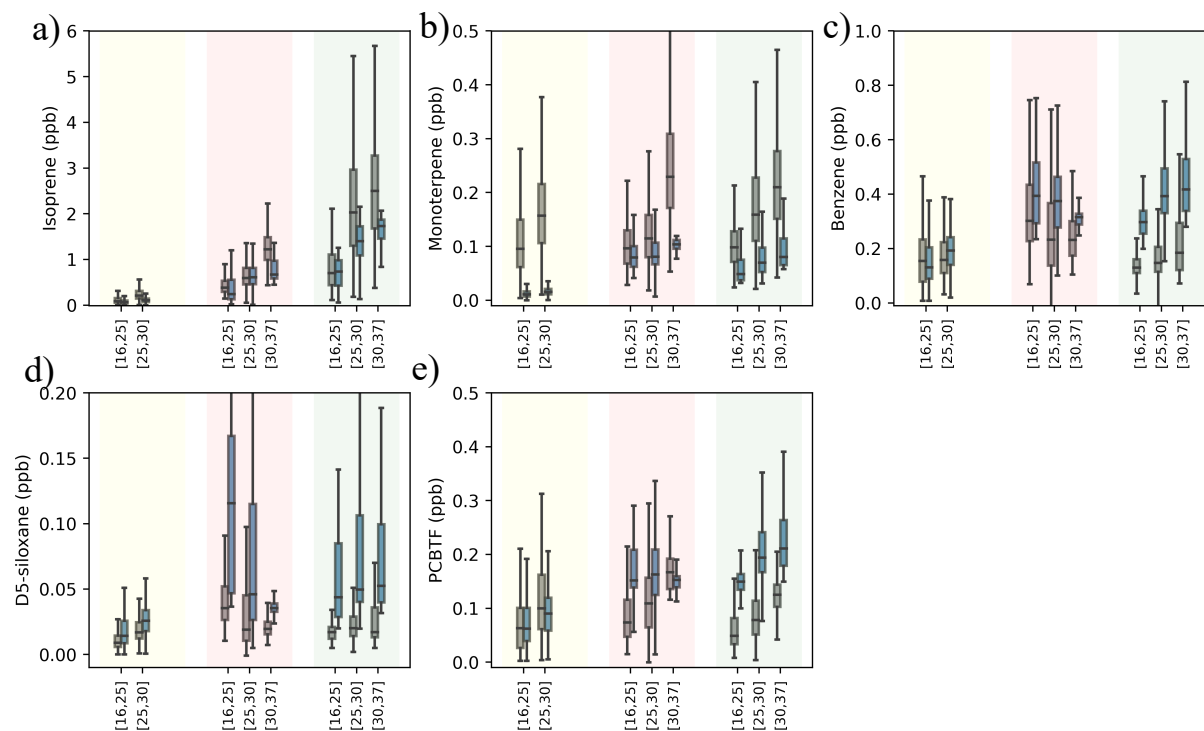

Figure S7: The comparison of the temperature dependence of key VOCs, including isoprene, monoterpene, benzene, D5-siloxane, and PCBTF, between observations (gray) and WRF-Chem simulation configured with RACM2B-VCP chemical mechanism (blue). The comparison to the RECAP airborne measurement in yellow shade; SUNVEX mobile measurements in red shade and SUNVEX ground measurements in green shade. The distribution is shown by a whisker plot; the line denotes the median value.

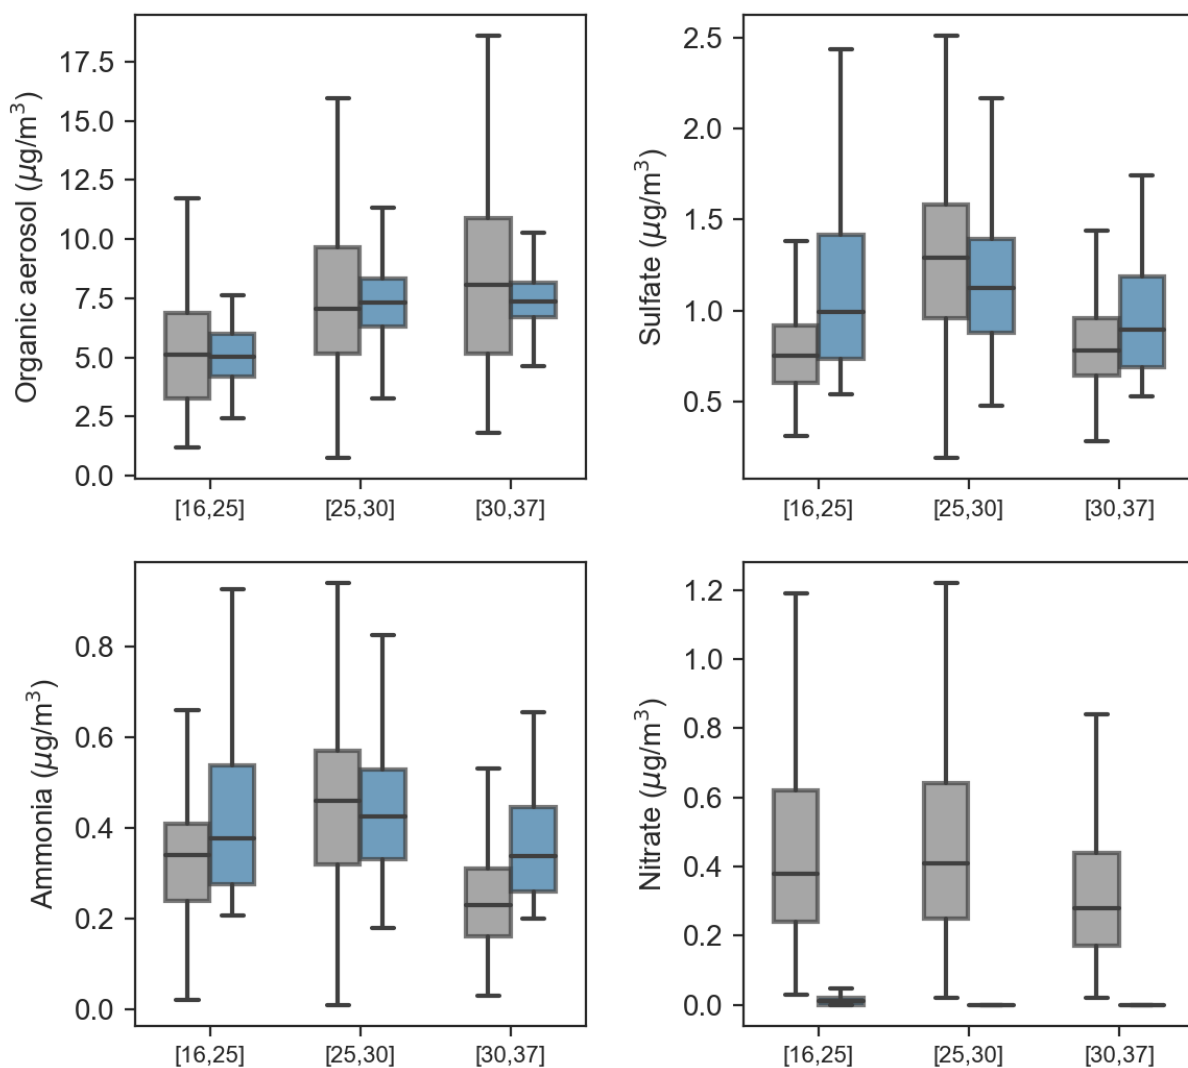

Figure S8: The comparison of the temperature dependence of aerosols, including organic, sulfate, ammonium, and nitrate aerosols, between in-situ observations (gray) and WRF-Chem simulation configured with RACM2B-VCP chemical mechanism (blue) at Pasadena. The distribution is shown by a whisker plot; the line denotes the median value.

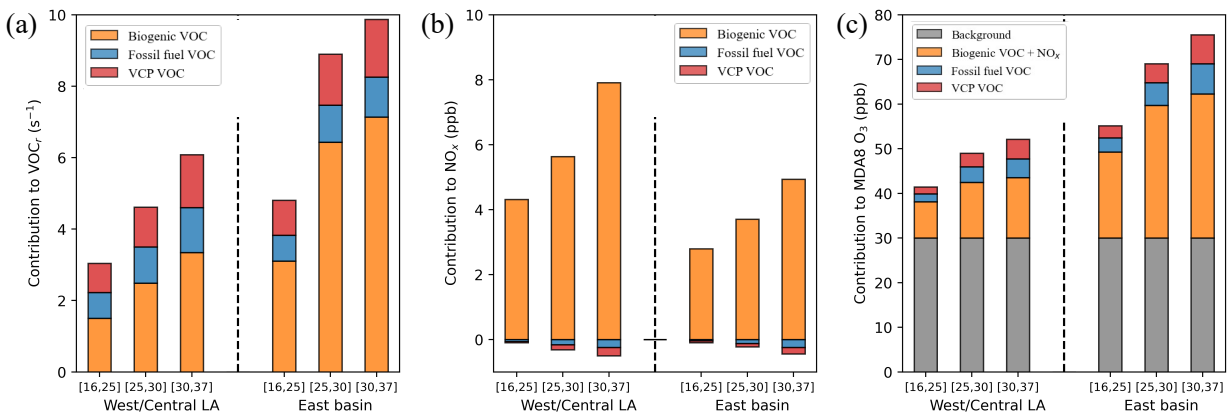

Figure S9: The contribution of VOC emissions from VCP and fossil fuel sources to VOC reactivity (a), NO<sub>x</sub> (b) and MDA8 O<sub>3</sub> (c), in West/Central LA and in East basin, under three temperature bins.

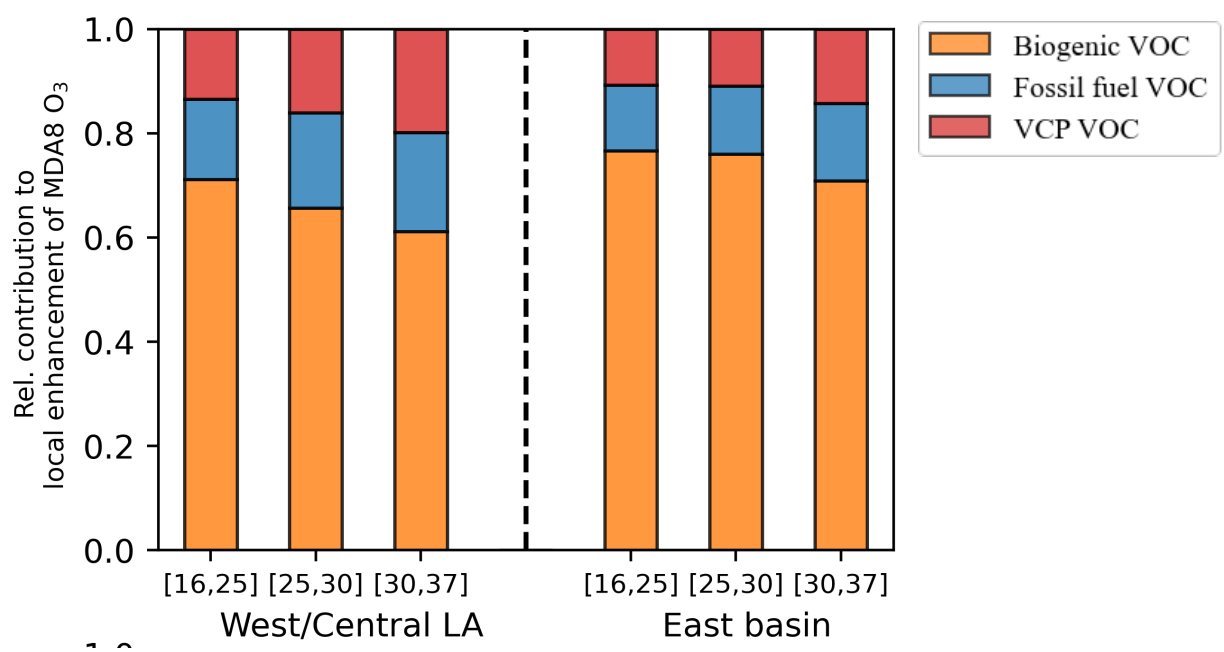

Figure S10: The relative contribution of VOC emissions from VCP and fossil fuel sources to local enhancement of MDA8 O<sub>3</sub> in West/Central LA and in East basin, under three temperature bins.
